# Supplementary material
Source: publisher figshare collection journal article supplement (https://frontiersin.figshare.com/ndownloader/files/13607759)
Supplement: Supplementary file [file 13607759]

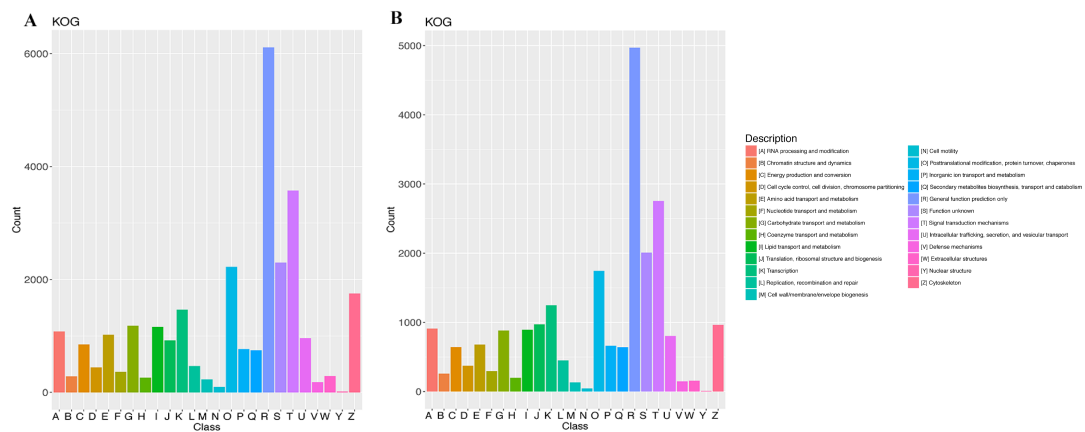

**Figure S1** euKaryotic Ortholog Groups (KOG) classification of unigenes. (A) *E. scrobiculatus*. (B) *E. brandti*.

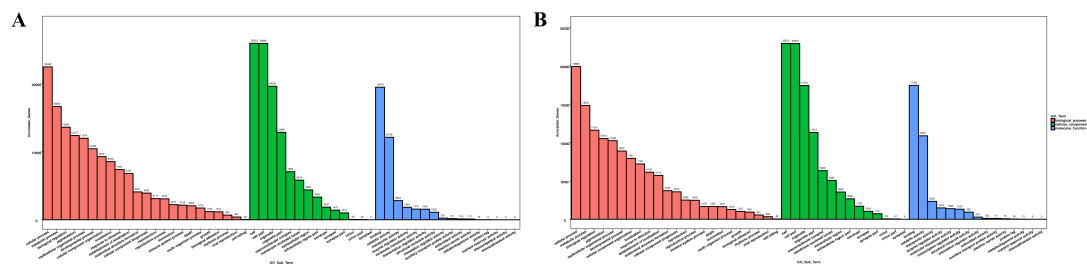

**Figure S2** Gene ontology (GO) classification of unigenes. (A) *E. scrobiculatus*. (B) *E. brandti*.

[illegible]

**Figure S3** Alignment of amino acid sequences of odorant binding proteins (OBPs) of *E. scrobiculatus* and *E. brandti*. Conserved cysteine sites are marked with red capital letter.

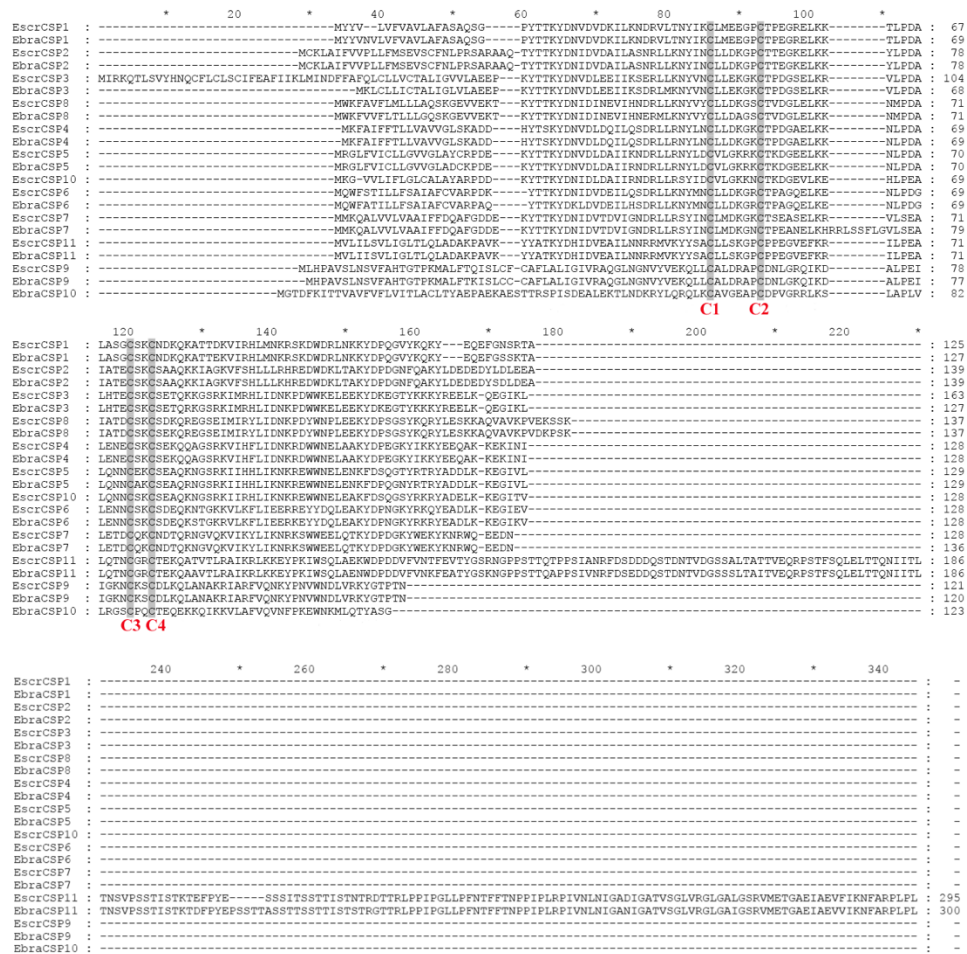

**Figure S4** Alignment of amino acid sequences of chemosensory proteins (CSPs) of *E. scrobiculatus* and *E. brandti*. Conserved cysteine sites are marked with red capital letter.

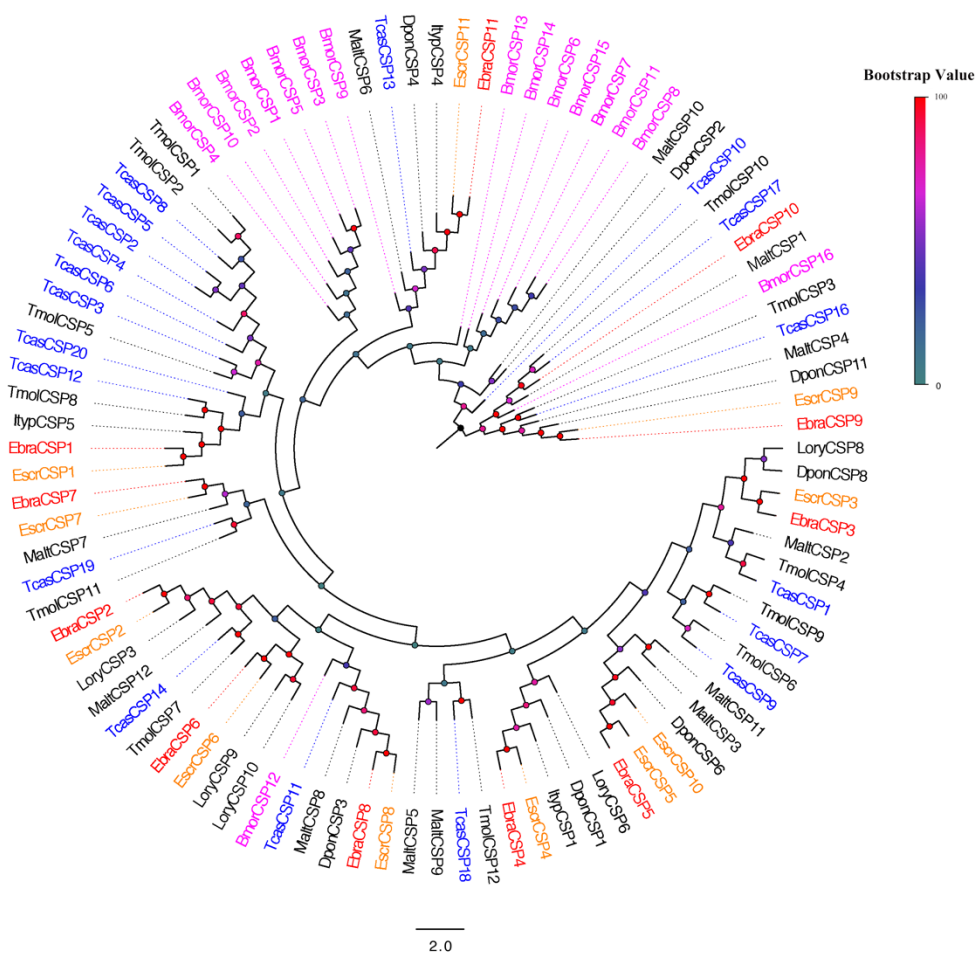

**Figure S5** Phylogenetic tree of putative chemosensory protein (CSP) genes. The tree was constructed using MEGA6 with Neighbor-joining method.

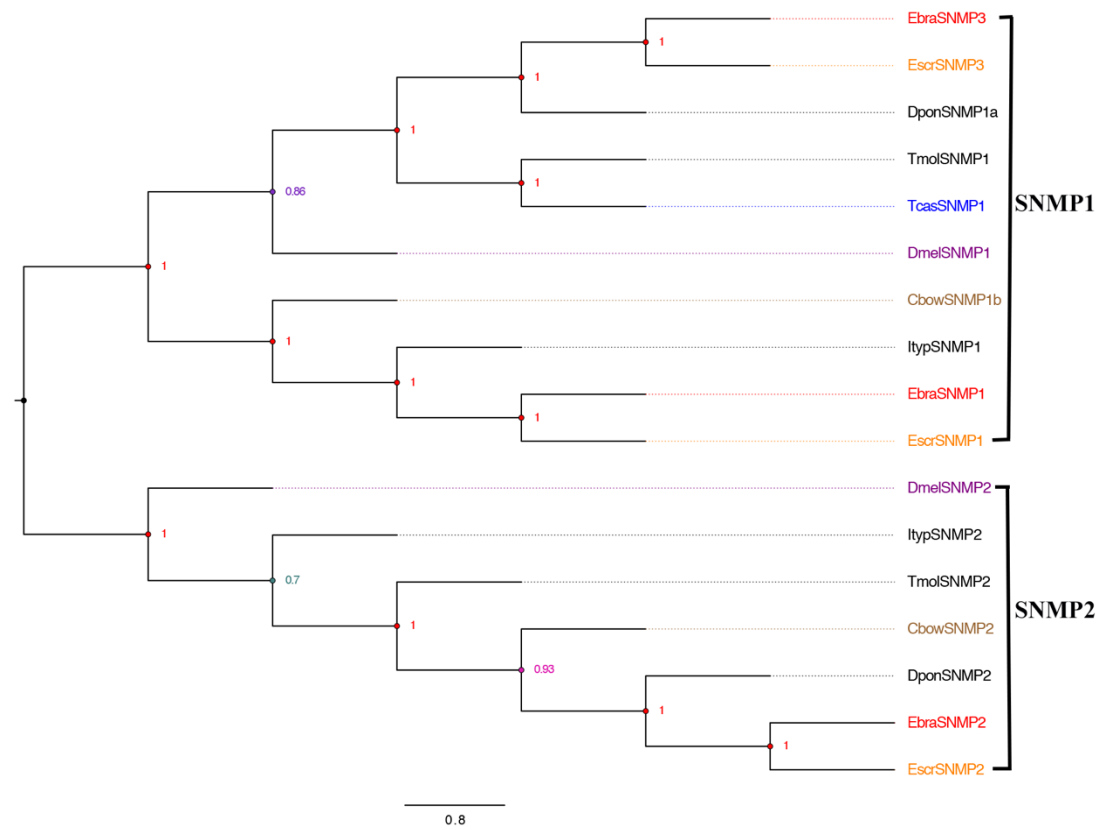

**Figure S6** Phylogenetic tree of putative sensory neuron membrane protein (SNMP) genes. The tree was constructed using MEGA6 with Neighbor-joining method.
